# Supplementary material for: Synthesis, characterization, electrochemical properties and catalytic reactivity of N-heterocyclic carbene-containing diiron complexes
Source: Royal Society of Chemistry journal article supplement (doi:10.1039/c4ra15150j), 2015-01-01
Supplement: c4ra15150j1.pdf [file c4ra15150j1.pdf]

## Supporting Information

# Synthesis, Characterization, Electrochemical Properties and Catalytic Reactivity of the N-Heterocyclic Carbene-Containing Diiron Complexes

Yanhong Wang<sup>1,2</sup>, Tianyong Zhang<sup>1,2\*</sup>, Bin Li<sup>1,2\*</sup>, Shuang Jiang<sup>1,2</sup>, Liao Sheng<sup>1,2</sup>

<sup>1</sup> School of Chemical Engineering and Technology, Tianjin Key Laboratory of Applied Catalysis Science and Technology, Tianjin University, Tianjin 300072, China.

<sup>2</sup> Collaborative Innovation Center of Chemical Science and Engineering (Tianjin), Tianjin 300072, China.

**Table S1.** Crystallographic data and refinement parameters for complexes **II** and **IV**.

| Parameter                                       | <b>II</b>                                                                                    | <b>IV</b>                                                                                    |
|-------------------------------------------------|----------------------------------------------------------------------------------------------|----------------------------------------------------------------------------------------------|
| Empirical formula                               | C <sub>18</sub> H <sub>22</sub> Fe <sub>2</sub> N <sub>4</sub> O <sub>4</sub> S <sub>2</sub> | C <sub>30</sub> H <sub>32</sub> Fe <sub>2</sub> N <sub>2</sub> O <sub>5</sub> S <sub>2</sub> |
| Formula weight                                  | 534.22                                                                                       | 676.40                                                                                       |
| Temperature(K)                                  | 293(2)                                                                                       | 113(2)                                                                                       |
| Wavelength(Å)                                   | 0.71073                                                                                      | 0.71075                                                                                      |
| Crystal system                                  | Orthorhombic                                                                                 | Orthorhombic                                                                                 |
| space group                                     | Pbca                                                                                         | Pna2 <sub>1</sub>                                                                            |
| a(Å)                                            | 13.733(3)                                                                                    | 28.207(4)                                                                                    |
| b(Å)                                            | 14.889(3)                                                                                    | 21.630(3)                                                                                    |
| c(Å)                                            | 21.978(4)                                                                                    | 10.2634(12)                                                                                  |
| α(deg)                                          | 90                                                                                           | 90                                                                                           |
| β(deg)                                          | 90                                                                                           | 90                                                                                           |
| γ(deg)                                          | 90                                                                                           | 90                                                                                           |
| Volume(Å <sup>3</sup> )                         | 4494.1(16)                                                                                   | 6261.7(13)                                                                                   |
| Z                                               | 8                                                                                            | 8                                                                                            |
| Calculated density(mg/m <sup>3</sup> )          | 1.579                                                                                        | 1.435                                                                                        |
| Absorption coefficient(mm <sup>-1</sup> )       | 1.508                                                                                        | 1.100                                                                                        |
| F(000)                                          | 2192                                                                                         | 2800                                                                                         |
| Crystal size(mm)                                | 0.20 x 0.18 x 0.12                                                                           | 0.24 x 0.18 x 0.16                                                                           |
| Theta range for data collection(deg)            | 1.85 to 27.91                                                                                | 1.72 to 27.12                                                                                |
| Limiting indices                                | -18≤h≤18<br>-19≤k≤19<br>-28≤l≤25                                                             | -36≤h≤36<br>-27≤k≤27<br>-12≤l≤13                                                             |
| Reflections collected                           | 38038                                                                                        | 69773                                                                                        |
| Reflections unique, R(int)                      | 5364, 0.0462                                                                                 | 13556, 0.0965                                                                                |
| Completeness to theta =                         | 27.91, 99.8%                                                                                 | 27.12, 99.8%                                                                                 |
| Absorption correction                           | Semi-empirical from<br>equivalents                                                           | Semi-empirical from<br>equivalents                                                           |
| Max. and min. transmission                      | 0.8397 and 0.7524                                                                            | 0.8436 and 0.7782                                                                            |
| Data / restraints / parameters                  | 5364 / 0 / 276                                                                               | 13556 / 73 / 798                                                                             |
| Goodness-of-fit on F <sup>2</sup>               | 1.079                                                                                        | 1.077                                                                                        |
| Final R indices [I>2σ(I)]                       | R1 = 0.0444<br>wR2 = 0.1115                                                                  | R1 = 0.0668<br>wR2 = 0.1445                                                                  |
| R indices (all data)                            | R1 = 0.0543<br>wR2 = 0.1187                                                                  | R1 = 0.0847<br>wR2 = 0.1549                                                                  |
| Largest diff. peak and hole(e Å <sup>-3</sup> ) | 0.506 and -0.454                                                                             | 0.432 and -0.478                                                                             |

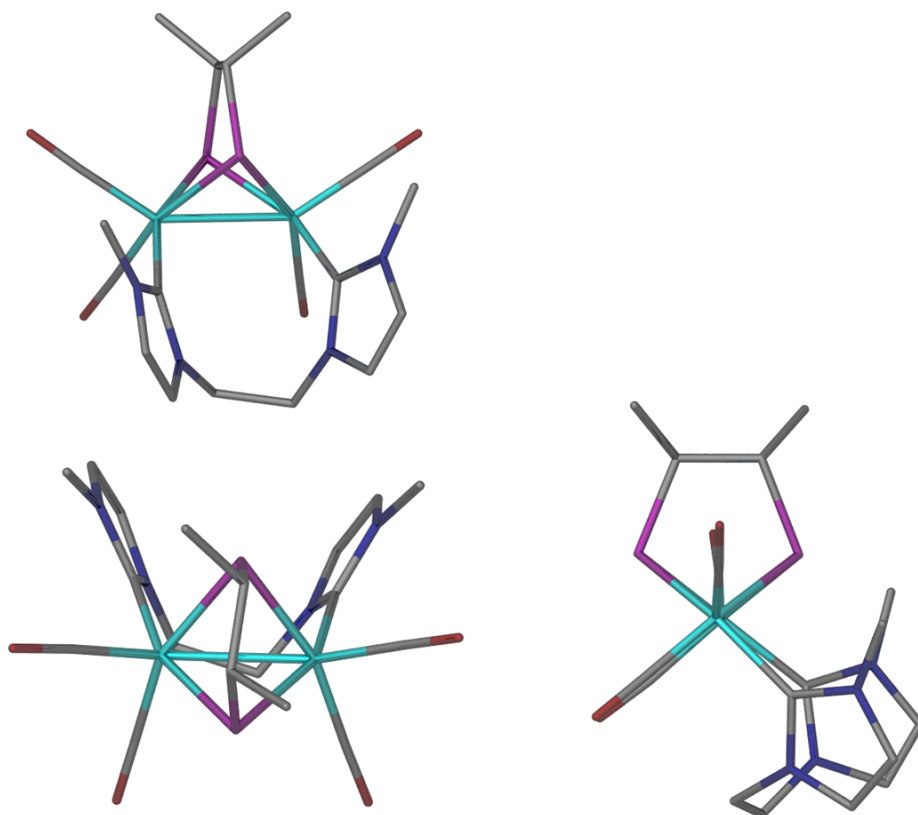

**Figure S1.** Stick drawing models of complex II given in three perspectives.

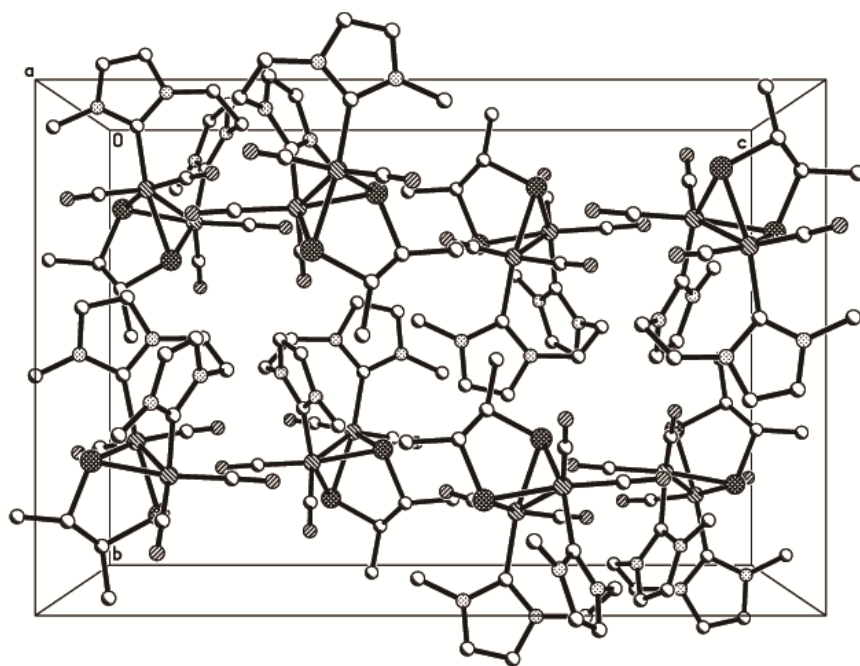

**Figure S2.** Unit cell of complex II.

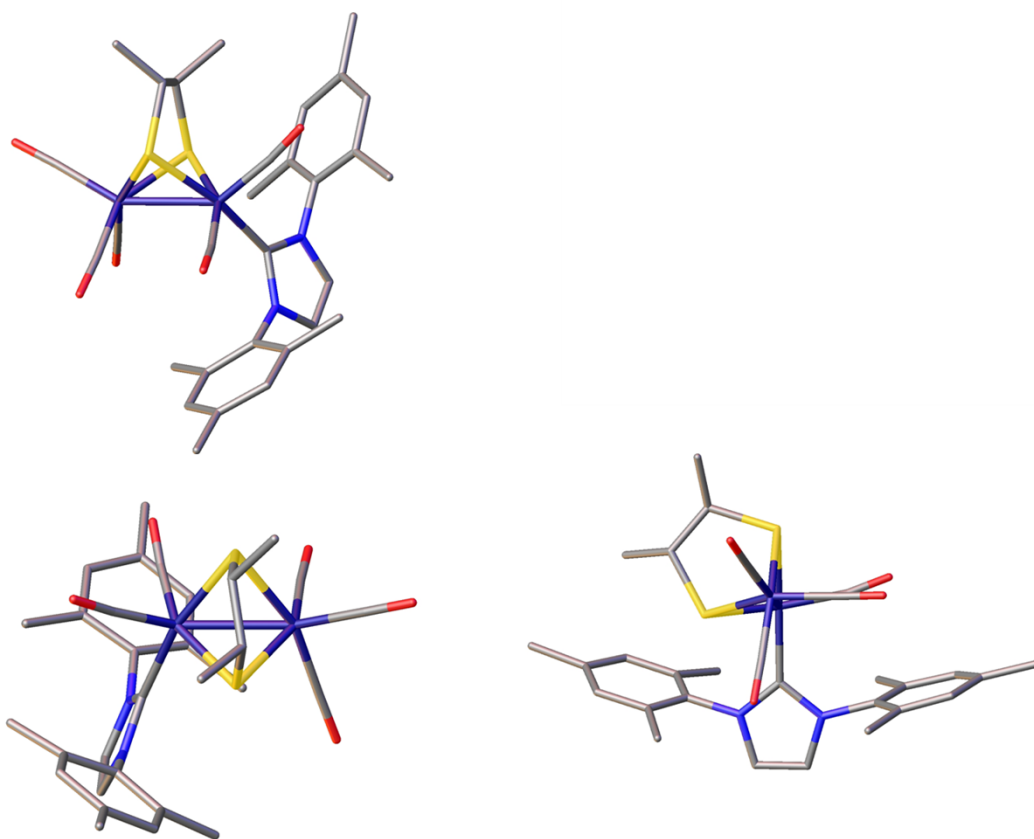

**Figure S3.** Stick drawing models of complex **IV** given in three perspectives.

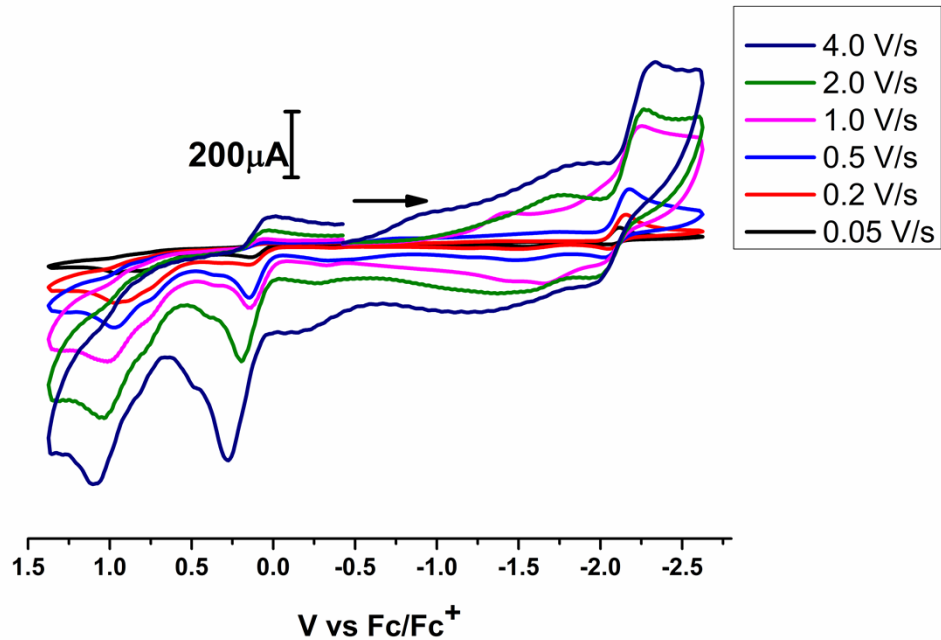

**Figure S4.** Cyclic voltammograms of the complex IV (2 mM) at various scan rates in CH<sub>3</sub>CN solution (0.1 M *n*-Bu<sub>4</sub>NPF<sub>6</sub>) under N<sub>2</sub> at room temperature. All potentials are scaled to Fc/Fc<sup>+</sup>=0.00 V.

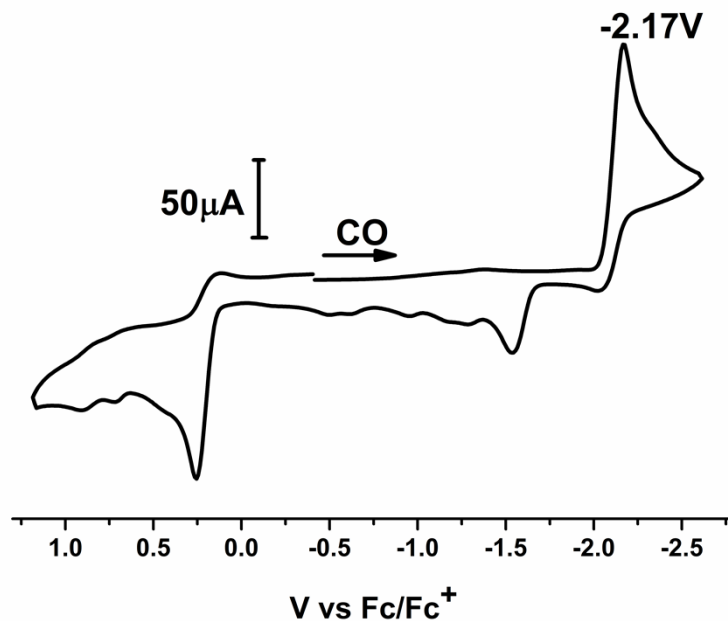

**Figure S5.** Cyclic voltammograms of the complex V (2 mM) in CH<sub>3</sub>CN solution (0.1 M *n*-Bu<sub>4</sub>NPF<sub>6</sub>; scan rate, 200 mV/s) under CO at room temperature. All potentials are scaled to Fc/Fc<sup>+</sup>=0.00 V.

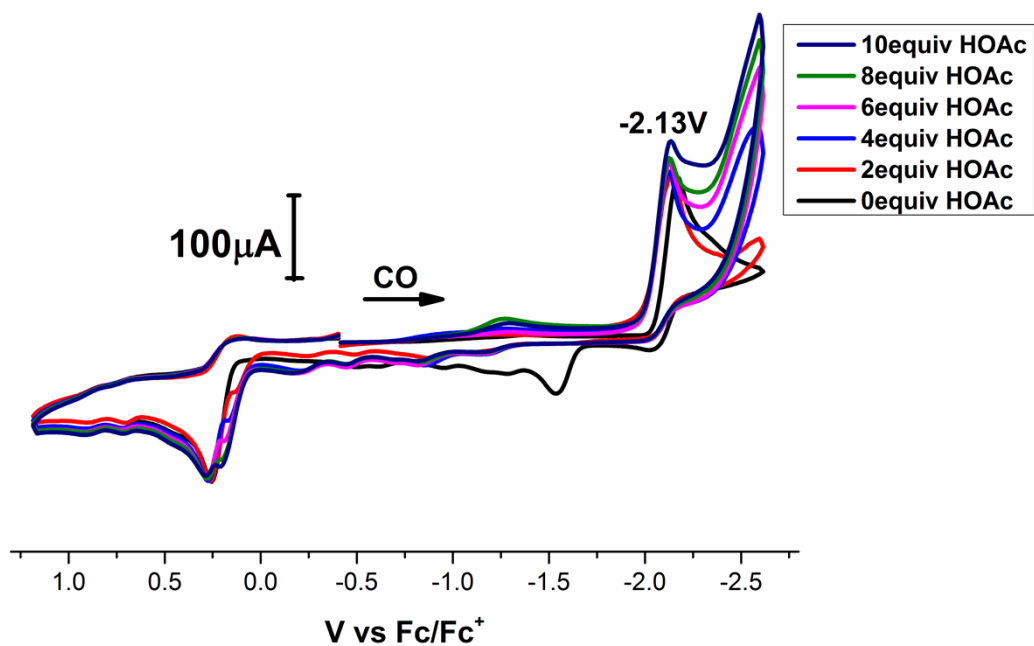

**Figure S6.** Cyclic voltammograms of the complex V (2 mM) with HOAc (0, 2, 4, 6, 8 and 10 equiv.) in CH<sub>3</sub>CN solution (0.1 M *n*-Bu<sub>4</sub>NPF<sub>6</sub>; scan rate, 200 mV/s) under CO. All potentials are scaled to Fc/Fc<sup>+</sup>=0.00 V.

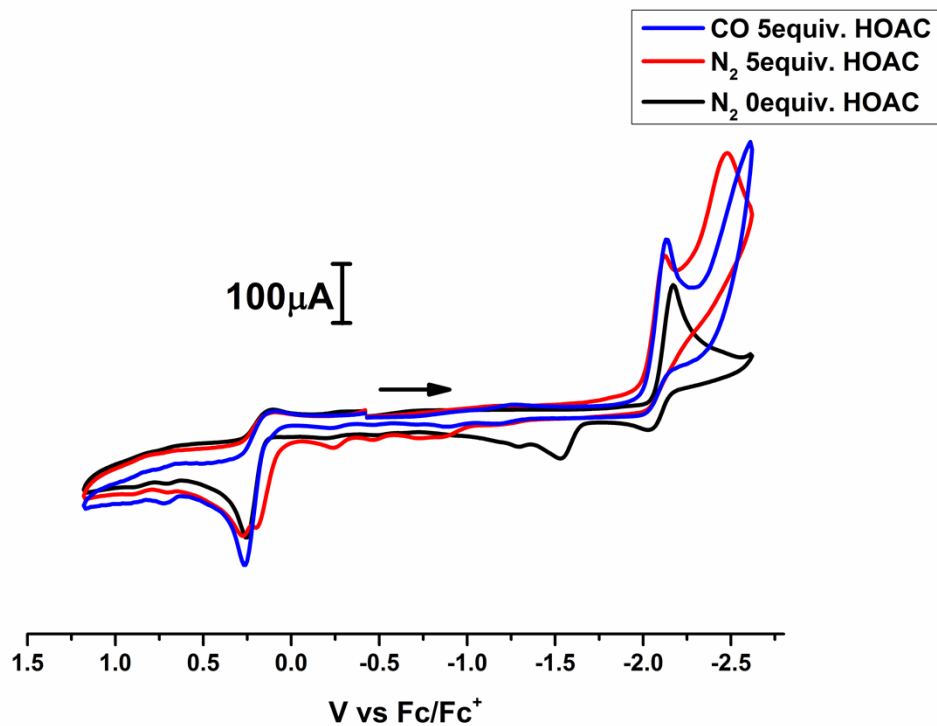

**Figure S7.** Cyclic voltammograms of the complex **V** (2 mM) in CH<sub>3</sub>CN solution (0.1 M *n*-Bu<sub>4</sub>NPF<sub>6</sub>; scan rate, 200 mV/s) (black, under N<sub>2</sub>) and with 5 equiv. HOAc (red, under N<sub>2</sub>; blue under CO). All potentials are scaled to Fc/Fc<sup>+</sup>=0.00 V.

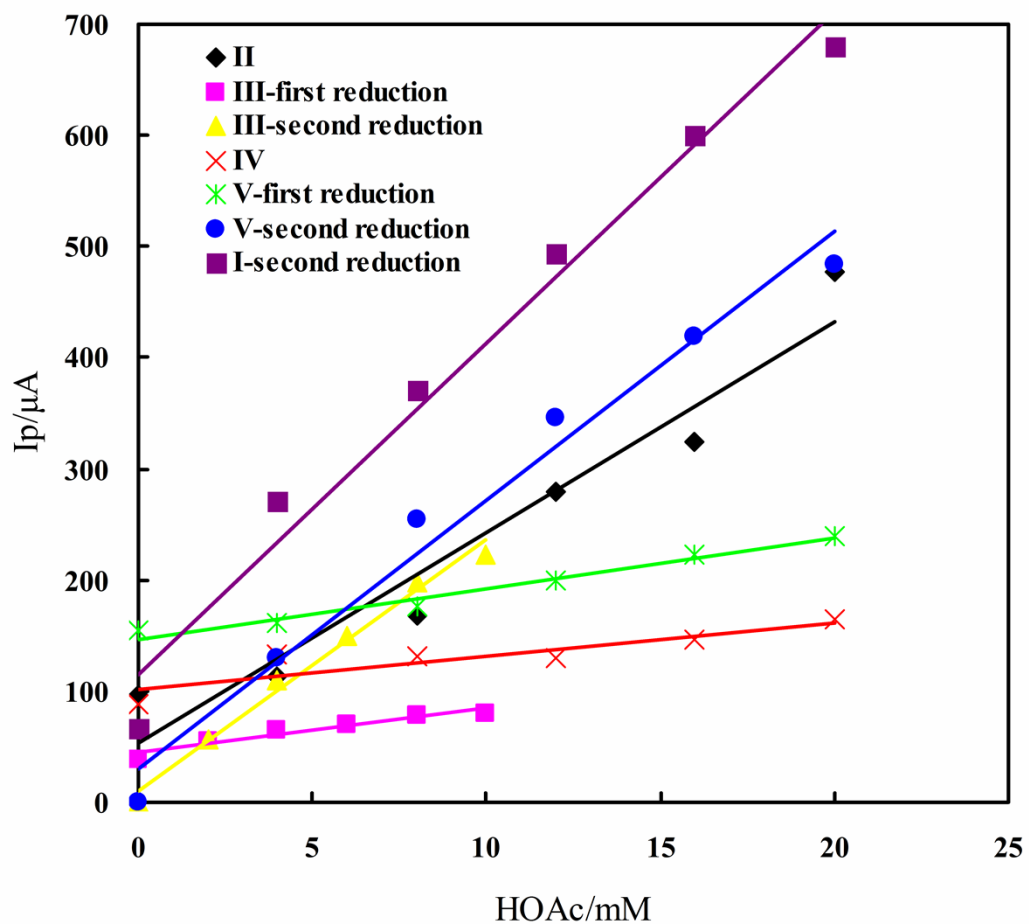

**Figure S8.** Dependence of current heights of electrocatalytic waves for the series of complexes (**I** (2 mM), **II** (2 mM), **III** (1 mM, Poor solubility), **IV** (2 mM) and **V** (2 mM)) on HOAc concentration (0, 2, 4, 6, 8, and 10 equiv.) in CH<sub>3</sub>CN solution.



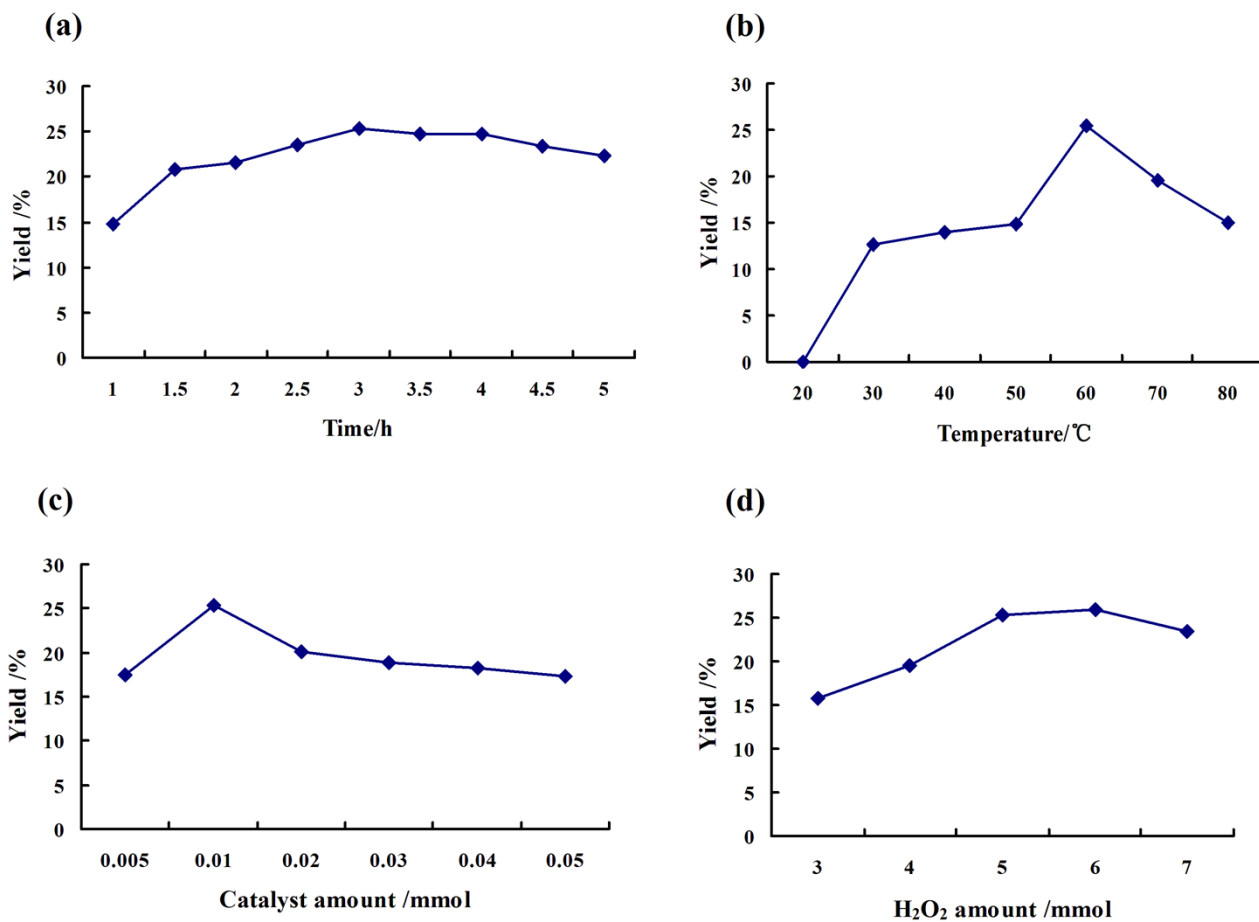

**Figure S9.** Effects of different parameters on hydroxylation of benzene to phenol.

a: **IV**, 0.01 mmol; benzene, 0.1 mL; CH<sub>3</sub>CN, 2.0 mL; H<sub>2</sub>O<sub>2</sub>, 5.0 mmol; 60 °C.

b: **IV**, 0.01 mmol; benzene, 0.1 mL; CH<sub>3</sub>CN, 2.0 mL; H<sub>2</sub>O<sub>2</sub>, 5.0 mmol; 3 h.

c: benzene, 0.1 mL; CH<sub>3</sub>CN, 2.0 mL; H<sub>2</sub>O<sub>2</sub>, 5.0 mmol; 60 °C; 3 h.

d: **IV**, 0.01 mmol; benzene, 0.1 mL; CH<sub>3</sub>CN, 2.0 mL; 60 °C; 3 h.

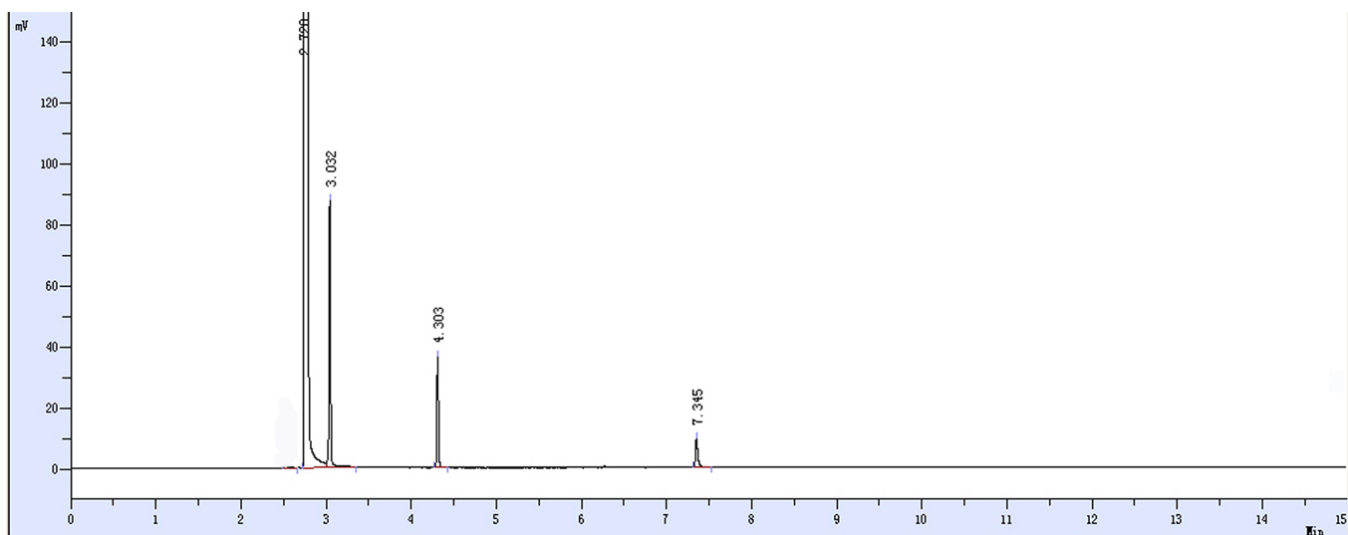

**Figure S10.** The GC of hydroxylation of benzene with  $\text{H}_2\text{O}_2$  by **IV** under the optimized experimental conditions (**IV**, 0.01 mmol; benzene, 0.1 mL;  $\text{CH}_3\text{CN}$ , 2.0 mL;  $\text{H}_2\text{O}_2$ , 6.0 mmol; 60 °C; 3 h; yield 25.9%). No by-product was detected.

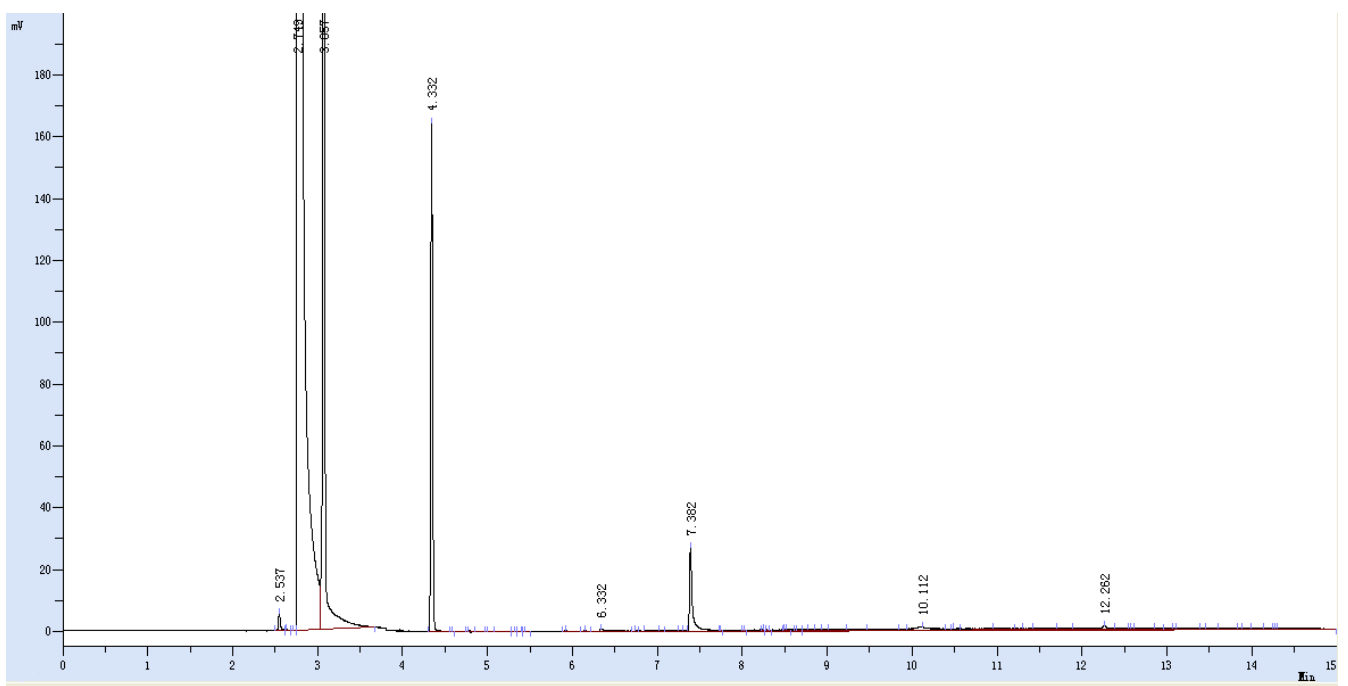

**Figure S11.** The GC of hydroxylation of benzene with  $\text{H}_2\text{O}_2$  by **IV** under 70 °C (**IV**, 0.01 mmol; benzene, 0.1 mL;  $\text{CH}_3\text{CN}$ , 2.0 mL;  $\text{H}_2\text{O}_2$ , 6.0 mmol; 70 °C; 3 h). By-products were detected.

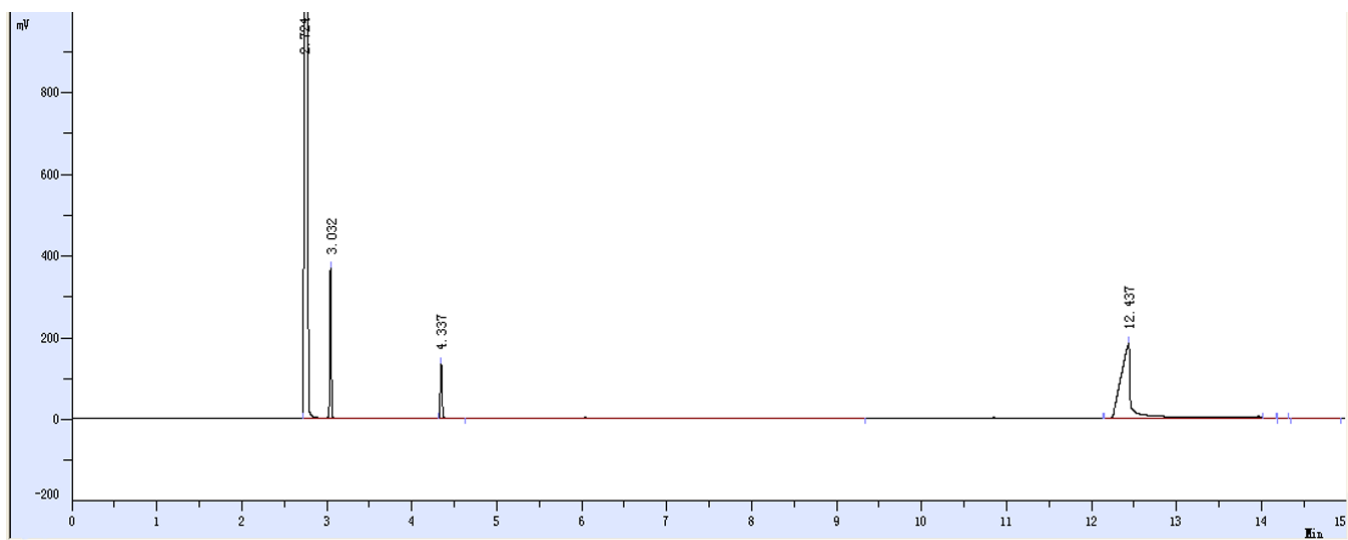

**Figure S12.** The GC of hydroxylation of benzene with *m*-CPBA by FeSO<sub>4</sub> under the experimental conditions (FeSO<sub>4</sub>, 0.01 mmol; benzene, 0.1 mL; CH<sub>3</sub>CN, 2.0 mL; *m*-CPBA, 6.0 mmol; 60 °C; 3 h). No phenol was detected.

**Table S2.** Retention times and the corresponding constituents of Figure S9 and Figure S10.

|                    |              |         |               |        |                              |
|--------------------|--------------|---------|---------------|--------|------------------------------|
| Retention time/min | 2.7          | 3.0     | 4.3           | 7.3    | 12.4                         |
| Constituent        | Acetonitrile | Benzene | Chlorobenzene | Phenol | <i>m</i> -Chlorobenzoic Acid |
